# Supplementary material
Source: publisher figshare collection journal article supplement (https://karger.figshare.com/articles/dataset/_/11603703)
Supplement: Supplementary file 1 [file 2]

**Supplemental Material**

**Affiliations**

- <sup>a</sup>Department of Public Health, Clinic of Children's Diseases, and Institute of Health Sciences, Vilnius University Institute of Clinical Medicine, Vilnius, Litauen;
- <sup>b</sup>European Academy of Paediatrics (EAP/UEMS-SP), Brüssel, Belgien;
- <sup>c</sup>MACVIA-France, Fondation partenariale FMC VIA-LR, CHU Montpellier, Montpellier, Frankreich;
- <sup>d</sup>INSERM U 1168, VIMA, Ageing and Chronic Diseases Epidemiological and Public Health Approaches, Villejuif, Frankreich;
- <sup>e</sup>UMR-S 1168, Université Versailles St-Quentin-en-Yvelines, Montigny le Bretonneux, Frankreich;
- <sup>f</sup>Euforea, Brüssel, Belgien;
- <sup>g</sup>Charité – Universitätsmedizin Berlin, Berlin, Deutschland;
- <sup>h</sup>Minister of Health, Vilnius, Litauen;
- <sup>i</sup>Minister of Health, Kiev, Ukraine;
- <sup>j</sup>Minister of Labour, Health and Social, Affairs, Tiflis, Georgien;
- <sup>k</sup>Minister of Health, Labour and Social Protection, Chişinău, Moldau;
- <sup>l</sup>European Parliament, Perugia, Italien;
- <sup>m</sup>European Parliament, Helsinki, Finnland;
- <sup>n</sup>Lithuanian Academy of Sciences, Vilnius, Litauen;
- <sup>o</sup>Faculty of Medicine, Transylvania University, Brasov, Rumänien;
- <sup>p</sup>Global Alliance Against Chronic Respiratory Diseases (GARD), Joensuu, Finnland;
- <sup>q</sup>Imperial College and Royal Brompton Hospital, London, Großbritannien;
- <sup>r</sup>Department of Pediatrics, and Iashvili Central Children's Hospital, Tbilisi State Medical University, Tiflis, Georgien;
- <sup>s</sup>Faculty of Postgraduate Education, Lviv National Medical University by Danylo Halytsky, Lwiw, Ukraine;
- <sup>t</sup>Department of Otorhinolaryngology, Amsterdam University Medical Centres, AMC, Amsterdam, Niederlande;
- <sup>u</sup>Centre for Genomics and Child Health, Blizard Institute, Queen Mary University of London, London, Großbritannien;
- <sup>v</sup>Skin and Allergy Hospital, Helsinki University Hospital and University of Helsinki, Helsinki, Finnland;
- <sup>w</sup>Children's Clinic, Tartu University Institute of Clinical Medicine, Tartu, Estland;
- <sup>x</sup>Vinnitsa National Medical University by Mykola Pyrogov, Vinnitsa, Ukraine;
- <sup>y</sup>Global Alliance Against Chronic Respiratory Diseases (GARD-WHO), Genf, Schweiz;
- <sup>z</sup>European Federation of Allergy and Airways Diseases Patients' Associations (EFA), Brüssel, Belgien;
- <sup>A</sup>Department of Human and Medical Genetics, Institute of Biomedical Sciences, Vilnius University Faculty of Medicine, Vilnius, Litauen;
- <sup>B</sup>Association of Medical Schools in Europe, Berlin, Deutschland;
- <sup>C</sup>State Institute of Physiopulmonology by Chiril Draganiuk, Chişinău, Moldau;
- <sup>D</sup>iQ4U Consultants Ltd, London, Großbritannien;
- <sup>E</sup>Department of Genetics and Clinical Immunology, National Institute of Tuberculosis and Lung Diseases, Warschau, Polen;
- <sup>F</sup>Clinic of Chest Diseases, Immunology and Allergology, Centre of Pulmonology and Allergology, Institute of Clinical Medicine, Vilnius University Medical Faculty, Vilnius, Litauen;
- <sup>G</sup>Medical School, European University of Cyprus, Nikosia, Zypern;
- <sup>H</sup>Tbilisi State University Faculty of Medicine, Tiflis, Georgien;
- <sup>I</sup>Clinic of Infectious Chest Diseases, Dermatology and Allergology, Institute of Biomedical Sciences, Institute of Clinical Medicine, Vilnius University, Faculty of Medicine, Vilnius, Litauen;
- <sup>J</sup>Clinic of ENT and Eye Diseases, Institute of Clinical Medicine, Vilnius University Medical Faculty, Vilnius, Litauen;
- <sup>K</sup>Danish Committee for Health Education, Kopenhagen, Dänemark;
- <sup>L</sup>Department of Prevention of Environmental Hazards and Allergology, Medical University of Warsaw, Warschau, Polen;
- <sup>M</sup>Institute of Child and Adolescent Health at Arabkir Medical Centre, Yerevan State Medical University, Jerewan, Armenien;

**Supplemental Material**

<sup>N</sup>Department of Immunology and Allergology, Medical Academy, Lithuanian University of Health Sciences, Kaunas, Litauen;

<sup>O</sup>European Health Futures Forum (EHFF), Dromahair, Irland;

<sup>P</sup>Clinic of Children's Diseases, Medical Academy, Lithuanian University of Health Sciences, Kaunas, Litauen;

<sup>Q</sup>Department of Rehabilitation, Physical and Sports Medicine, Institute of Health Sciences, Vilnius University Medical Faculty, Vilnius, Litauen;

<sup>R</sup>Department of Otorhinolaryngology, University Hospital Leuven, Löwen, Belgien;

<sup>S</sup>Academic Medical Center, University of Amsterdam, Amsterdam, Niederlande.
